# Supplementary material
Source: PubMed Central journal article supplement (PMC5118492)

## Supplements

### Supplementary Table1. Three-year Average of AOD-derived PM<sub>2.5</sub> and PM<sub>2.5</sub> Slope in the 282

#### Cities from 2004-2014

|                                              | Min. | q25  | Median | Mean | q75  | Max.  |
|----------------------------------------------|------|------|--------|------|------|-------|
| 2004                                         | 6.9  | 27.0 | 46.0   | 45.8 | 63.9 | 88.5  |
| 2005                                         | 7.5  | 29.3 | 47.3   | 48.9 | 67.8 | 95.0  |
| 2006                                         | 6.9  | 31.9 | 50.7   | 51.3 | 71.2 | 99.8  |
| 2007                                         | 7.1  | 33.5 | 54.3   | 55.4 | 76.6 | 110.4 |
| 2008                                         | 8.1  | 32.7 | 54.1   | 55.6 | 77.1 | 110.5 |
| 2009                                         | 6.8  | 33.3 | 53.5   | 54.7 | 75.3 | 99.7  |
| 2010                                         | 6.7  | 32.9 | 52.9   | 53.5 | 74.9 | 99.3  |
| 2011                                         | 5.9  | 32.8 | 53.6   | 54.5 | 75.0 | 110.3 |
| 2012                                         | 6.1  | 33.3 | 51.6   | 53.4 | 72.4 | 114.3 |
| Slope - $\mu\text{g}/\text{m}^3/\text{year}$ | -1.1 | 0.4  | 0.7    | 0.8  | 1.3  | 3.2   |

**Supplementary Table 2. Social and Economic Characteristics of the Study Cities by Strata of PM<sub>2.5</sub> Level\***

|                                 | PM <sub>2.5</sub> Level, µg/m <sup>3</sup> |               |               | P value |
|---------------------------------|--------------------------------------------|---------------|---------------|---------|
|                                 | Low                                        | Medium        | High          |         |
|                                 | (6-33)                                     | (34-72)       | (73-114)      |         |
| Disposable Income - yuan        | 25,178 (7140)                              | 26,361 (6786) | 24,152 (5138) | 0.13    |
| Teachers - per 1000 capita      | 9.0 (2.4)                                  | 8.3 (2.0)     | 8.1 (2.1)     | 0.04    |
| Doctors - per 1000 capita       | 3.4 (1.7)                                  | 3.3 (1.4)     | 3.1 (1.7)     | 0.49    |
| Hospital beds - per 1000 capita | 6.9 (2.9)                                  | 6.9 (2.6)     | 6.5 (2.6)     | 0.68    |

\*According to the "China City Statistical Yearbook, 2014" edited by the National Bureau of Statistics of the People's Republic of China (<http://www.stats.gov.cn/>).

**Supplementary Figure 1. Geographic Distribution of the Biopsy Series.**

**Supplementary Figure 2. Increasing Trends of Membranous Nephropathy Were Observed in All Age Groups (Top) and Geographic Regions (Bottom).**

**Supplementary Figure 3. Increasing Trends of Membranous Nephropathy Stratified by  $PM_{2.5}$  Slope.**

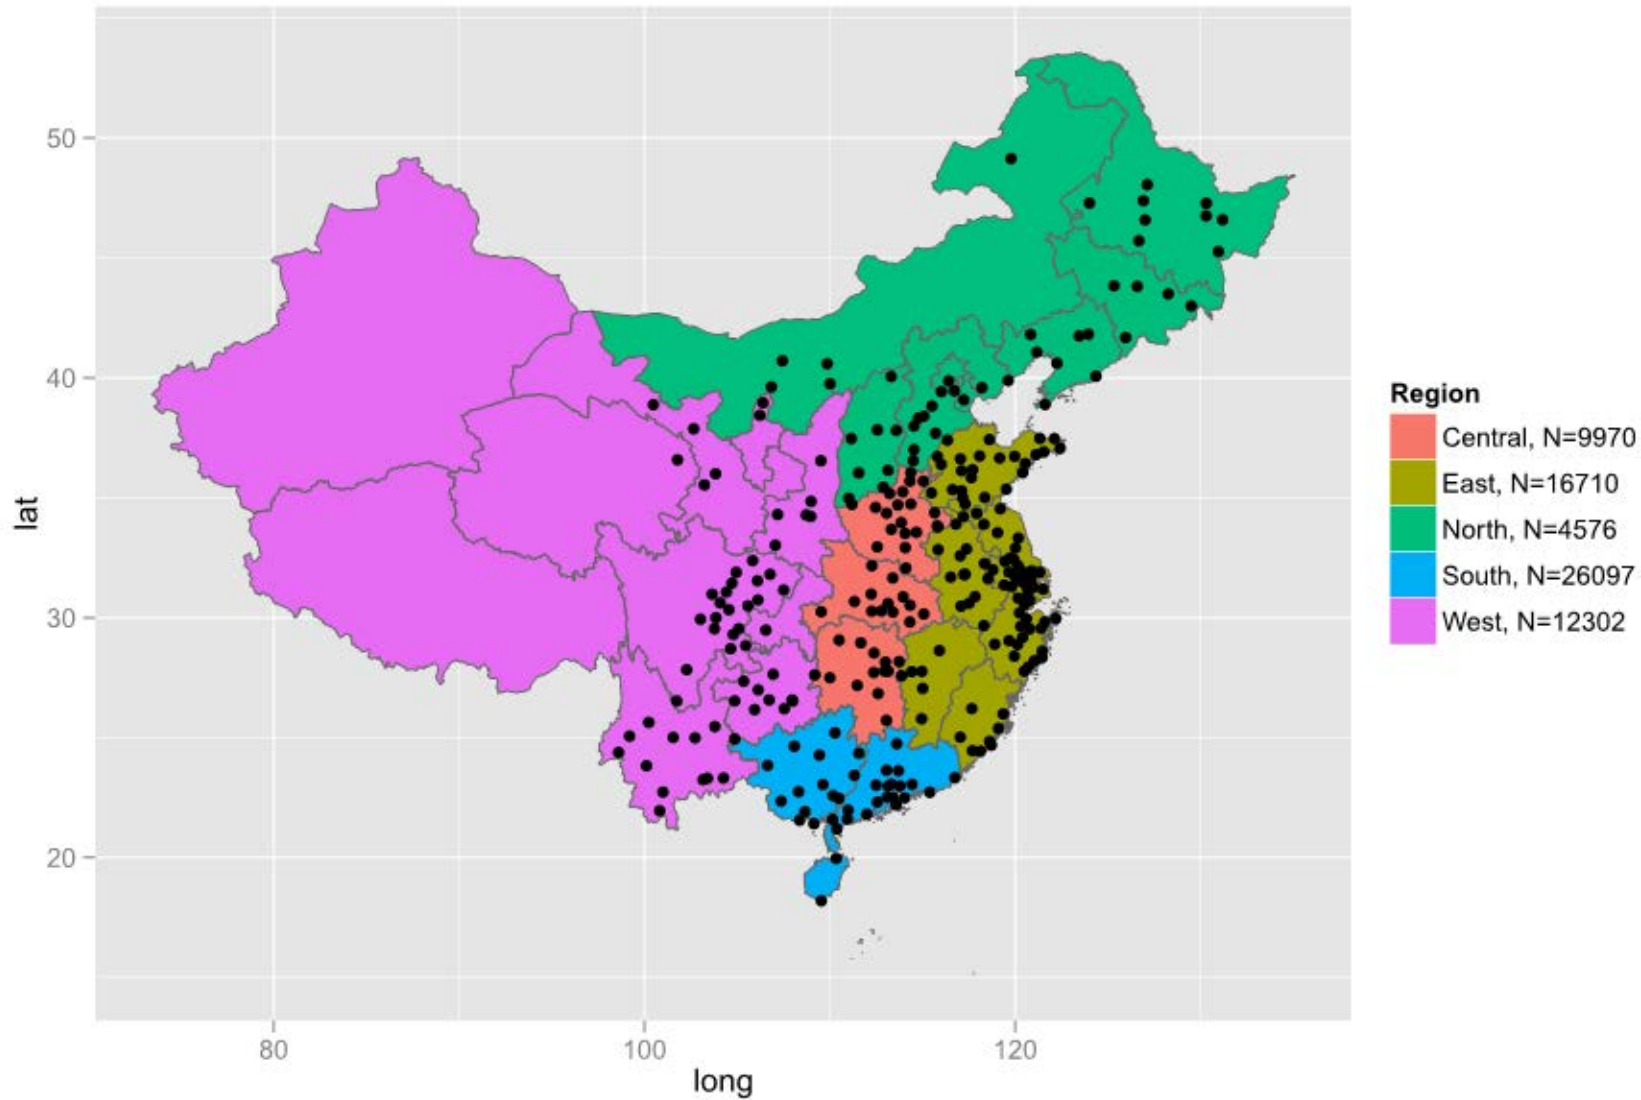

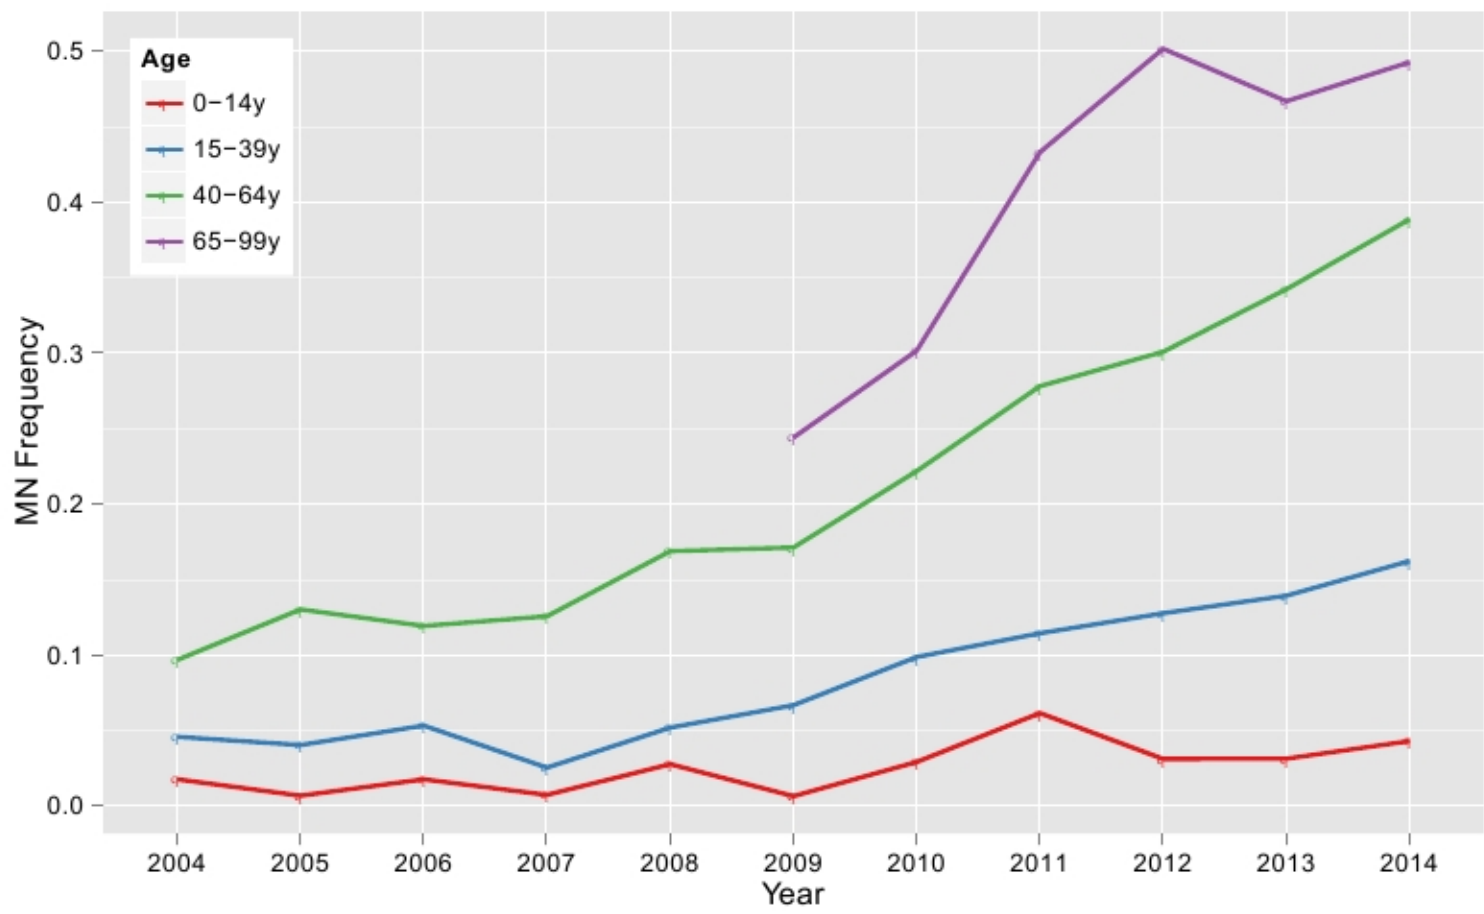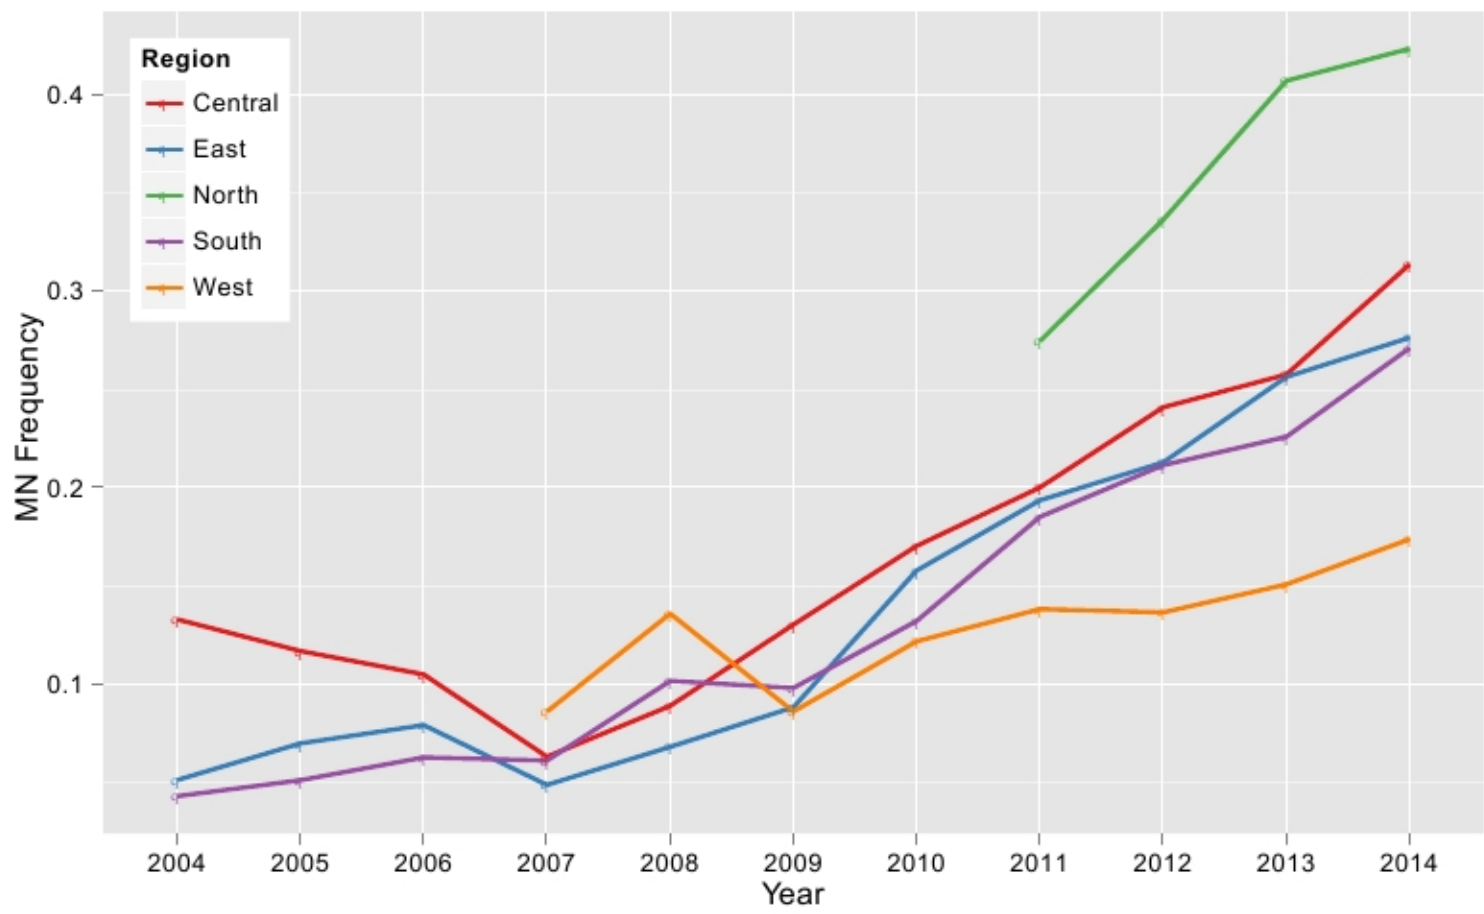

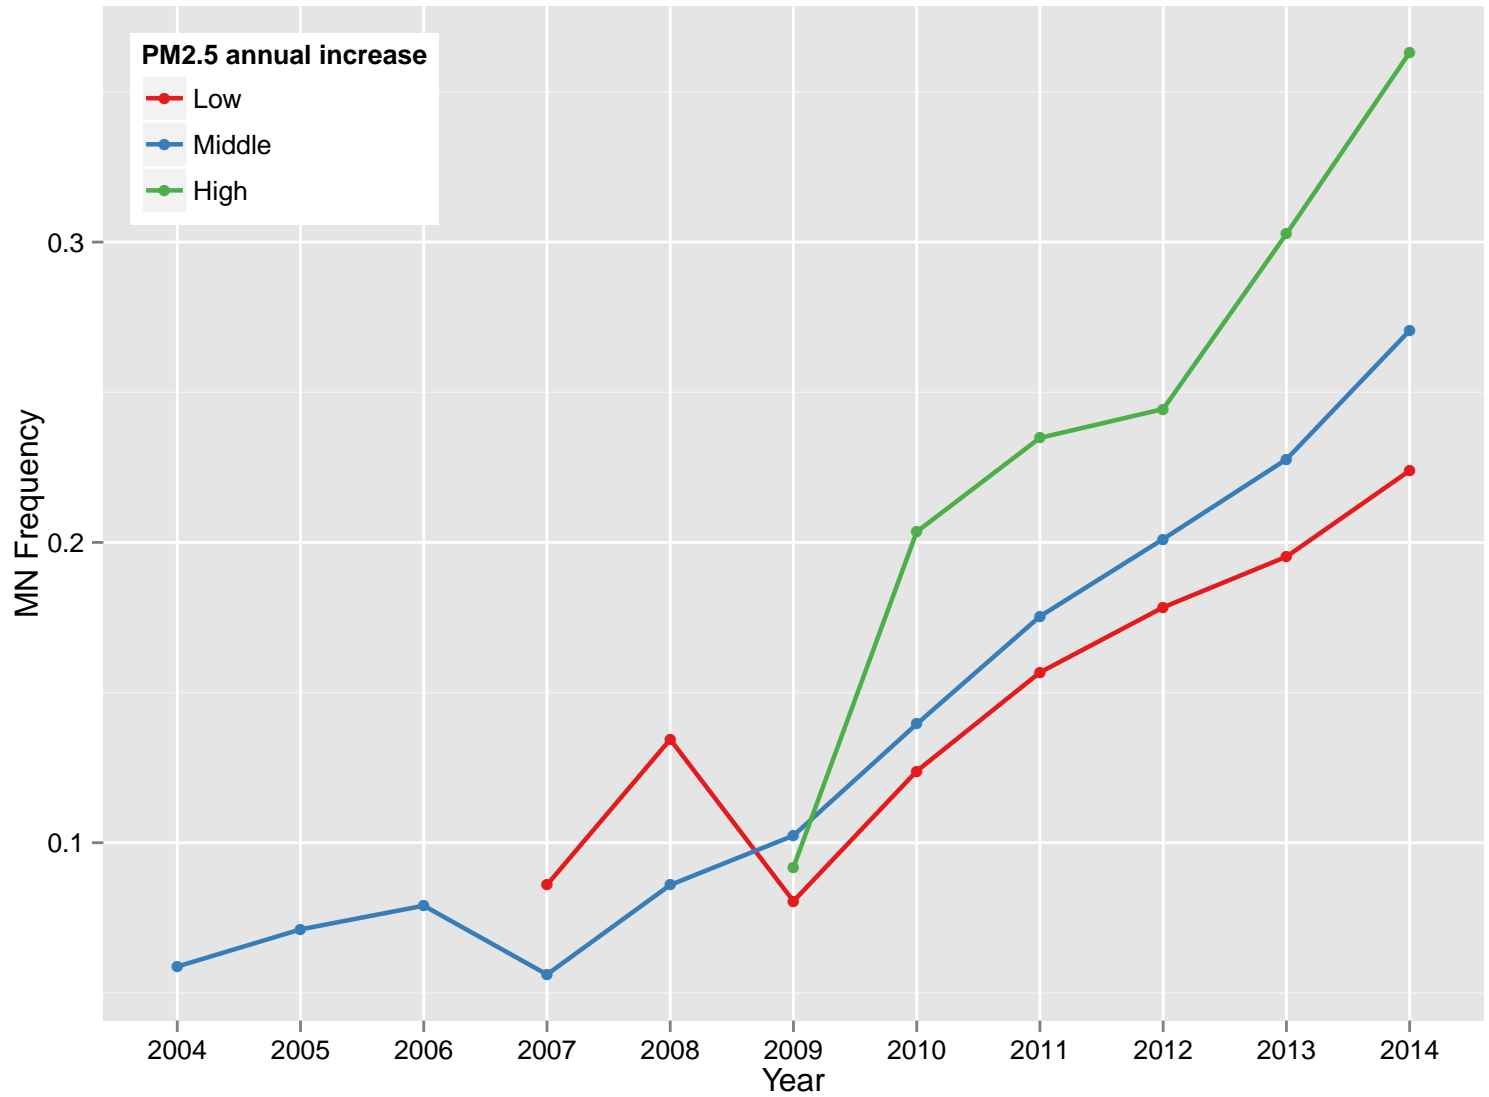

Supplement: ASN.2016010093SupplementaryData.pdf [file ASN.2016010093SupplementaryData.pdf]
